**A simple, cheap, and robust protocol for the identification of mating type in**  
*Saccharomyces cerevisiae*

Samantha D. M. Arras<sup>1</sup>, Lucy Mitsugi-McHattie<sup>1</sup>, Matthew A. Woods<sup>2</sup>, Charlotte E. Johnson<sup>1</sup>, Sylvie Hermann-Le Denmat<sup>1</sup>, and Austen R. D. Ganley<sup>1,2\*</sup>

<sup>1</sup>School of Biological Sciences, University of Auckland, Auckland, 1142, New Zealand

<sup>2</sup>Institute of Natural and Mathematical Sciences, Massey University, Auckland 0632, New Zealand

\*Correspondence email: [a.ganley@auckland.ac.nz](mailto:a.ganley@auckland.ac.nz)

## 1 **Abstract**

2 *Saccharomyces cerevisiae* is an exceptional genetic system, with genetic crosses facilitated by  
3 its ability to be maintained in haploid and diploid forms. Such crosses are straightforward as  
4 long as the mating type and ploidy of the strains are known. Haploid *S. cerevisiae* cells are  
5 either *MATa* or *MAT $\alpha$*  mating type. Several techniques can be used to determine mating type  
6 (or ploidy), but are typically time-consuming, require specialized components, and/or the  
7 results are inconsistent and transient. Here we validated a simple, cheap and robust method to  
8 enable rapid identification of *S. cerevisiae* mating types. When cells of opposite mating type  
9 are mixed in liquid media, they creep up culture vessel sides, a phenotype that can easily be  
10 detected visually. In contrast, mixtures of cells of the same mating type or with a diploid  
11 strain(s) simply settle out. The method does not require specialized equipment, and is robust to  
12 different media, cell densities, temperatures and strains. It can be performed in 96-well plates,  
13 and the phenotype is observable for several days. The simplicity and robustness of this method  
14 makes it ideal for routine verification of *S. cerevisiae* mating type, and it could be used to  
15 screen for genes underlying the creeping phenotype.

## 16 **Introduction**

17 The demonstration of transformation (Hinnen et al. 1978) and plasmid maintenance (Beggs  
18 1978) in Brewer's yeast established *Saccharomyces cerevisiae* as a premier eukaryotic model  
19 for molecular genetics. This status is maintained today, aided by its ease of culturing, single  
20 cell growth habit, small genome and remarkably efficient homologous recombination, but also  
21 because it can be maintained in haploid and diploid forms, and undergo genetic crossing.  
22 Haploid *S. cerevisiae* cells are one of two mating types, *MATa* or *MAT $\alpha$* , and mating type is  
23 determined by the identity of the DNA sequence at the *MAT* locus (Haber 2012). The *MAT $\alpha$*   
24 allele encodes two genes that specify the  $\alpha$ -specific phenotype, while the *MATa* allele encodes  
25 a transcriptional repressor that, in diploids, suppresses the default **a** phenotype. *S. cerevisiae*  
26 cells contain all the genetic information at silent *HML* and *HMR* mating type loci (located  
27 separately to the *MAT* locus) to be either *MATa* or *MAT $\alpha$* , but only the allele at the *MAT* locus  
28 is expressed (Haber 2012). Nevertheless, wild-type *S. cerevisiae* are homothallic, meaning they  
29 contain the genetic machinery necessary to self-mate. This occurs through mating-type  
30 switching, where expression of an endonuclease encoded at the *HO* locus in mother cells results  
31 in homologous recombination-mediated swapping of the *MAT* allele to the opposite allele *via*  
32 the genetic material present at the silent *HML* or *HMR* locus (Haber 2012). In most laboratory  
33 *S. cerevisiae* strains, however, mating type is extremely stable and heritable due to deletion of  
34 the *HO* endonuclease gene, which abolishes mating type switching. The ability to maintain  
35 haploid yeast strains of stable mating types so that genetic crosses between different mating  
36 types can be performed has been pivotal to the success of *S. cerevisiae* as a model genetic  
37 organism.

38

39 The ability to perform genetic crosses in *S. cerevisiae* relies on knowing the mating types of  
40 the haploid strains involved. While the mating type and ploidy of established laboratory strains  
41 are generally known, there are a number of scenarios where they need to be determined; for  
42 example, when dissecting ascospores to produce haploid strains, when mating haploid strains  
43 without the use of markers, or when mutating the *HO* locus in wild-type strains. Current  
44 methodologies for determining mating type and ploidy include using PCR with mating type  
45 locus primers that result in different amplification product sizes depending on which mating  
46 type allele is present (Bradbury et al. 2006). Flow cytometry/FACS can also be used to  
47 determine if a cell is haploid or diploid. Furthermore, crossing known *MATa* or *MAT $\alpha$*  strains  
48 with unknown strains by mixing the colonies, incubating overnight with shaking, and then  
49 looking for the mating phenotype by ‘shmoo’ formation under a microscope can be used to  
50 assay mating type. The shmoo phenotype results from morphological changes that are induced  
51 upon detection of the opposite mating type pheromone, and involves cells elongating to contact  
52 each other (Duntze et al. 1970; Sprague 1991). However, in our experience at least, shmoo  
53 formation is sometimes ephemeral and only observed in a small number of cells, thus this assay  
54 lacks robustness. Alternatively, the resultant mated mixture can be spread on selective plates  
55 to look for cells containing markers from both parents, but this is time-consuming and requires  
56 appropriate markers (Sherman 1991). Another method is the “halo” method that relies on  
57 inhibition of certain strains by pheromone production, but this requires specialized tester strains  
58 (Sprague 1991). Thus, these methods are time-consuming, require specific components, and/or  
59 produce inconsistent and transient results.

60

61 Here, we demonstrate a simple, cheap and robust method to enable the rapid identification of  
62 the mating type and ploidy of *S. cerevisiae* strains. The principle of the method is that when  
63 cells of opposite mating type are mixed, they undergo a change that can easily be detected

64 visually in a culture tube. An unknown strain can be individually mixed with known tester  
65 strains of each mating type in a culture medium, left for ~18 hours (overnight), and then simply  
66 observed. When the cells are of opposite mating type, the cultures “creep” up the sides of the  
67 culture vessel, unlike cultures with a mixture of cells of the same mating type or cultures with  
68 a diploid strain, which simply settle out. Observing the pattern formed with the two tester  
69 strains allows the accurate distinction of both mating types as well as of diploid strains. This  
70 response is long-lasting (the difference is routinely observed for several days, making it much  
71 less transient than shmoo formation), it does not require the specialised equipment or reagents  
72 used in other assays, and it requires little hands-on time.

## 73 **Methods**

### 74 **Yeast strains and standard growth conditions**

75 All strains used in this study are listed in **Supplementary Table 1**. Culture media used were  
76 YPD (1% yeast extract, 2% bacto-peptone and 2% glucose), YPGlycerol (1% yeast extract, 2%  
77 bacto-peptone and 2% glycerol) or YNB (0.45% yeast nitrogen base with ammonium sulphate,  
78 appropriate amino acids and bases, and 2% glucose). Strains were stored in 15% glycerol at -  
79 80°C until use.

80

### 81 **Mating type assay**

82 Strains were revived from glycerol stocks on YPD medium then grown overnight in liquid  
83 YPD at 30°C unless stated otherwise. Strains were diluted to OD<sub>600nm</sub> 0.2 in culture medium  
84 and added in equal volumes to a tube (2 mL per strain for a test tube, 250 µL for an eppendorf  
85 tube, or 100 µL for a 96-well plate). Cultures were left with no shaking for approximately 18  
86 hours, after which they were observed and photographed. Time-lapse photography was  
87 performed using a Nikon D850 camera with a 60 mm macro lens and polarising filter. Images  
88 were exposed at ISO200, f/16 for 10 seconds. Photographs were taken every minute from the  
89 start of the experiment to 20 hours.

90

### 91 **Multiplex PCR to confirm mating type assay**

92 Primers MAT-a 5'-CAATGATTA AAAATAGCATAGTCGG-3', MAT-alpha 5'-  
93 CAGCACGGAATATGGGAC-3' and MAT-R 5'-GGTGCATTTGTCATCCGTC-3'  
94 (Bradbury et al. 2006), were used in a multiplex PCR reaction to amplify mating-type specific  
95 PCR products from 2 µL of mating culture in a final volume of 25 µL. PCR was performed

96 with the KAPA2G Robust DNA polymerase in GC buffer (Custom Science). Cycling  
97 parameters were initial incubation of 10 mins at 94°C, then 35 cycles of 94°C for 25 seconds,  
98 55°C for 25 seconds and 72°C for 90 seconds. The MAT $\alpha$  amplicon (466 bp) and  
99 MAT $\alpha$  amplicon (489 bp) were visualized on a 2% agarose gel run at 135 V for 1 hour in  
100 sodium borate buffer (10 mM NaOH, 36 mM boric acid).

## 101 **Results and discussion**

### 102 **A quick and reliable assay for determination of mating type in *S. cerevisiae***

103 Routine observations in our laboratory showed that *S. cerevisiae* cells of different mating types  
104 settled in non-shaking cultures differently to cells of the same mating type. The basis of this  
105 “mating type phenotype” is that cultures of *S. cerevisiae* cells of opposite mating types  
106 consistently “creep” up the sides of the culture vessel when mixed and left overnight on the  
107 bench with no shaking (**Figure 1**). This phenotype is not observed in cultures with a mixture  
108 of cells of the same mating type (**a** or **α**) or where one or both types are diploid - these instead  
109 simply settle to the bottom of the vessel (**Figure 1**).

110

111 We decided to investigate this observation further under a variety of conditions to determine  
112 whether it could form a robust mating type assay. We found that the creeping phenotype is  
113 observed in large glass test tubes, plastic microfuge tubes, and round bottom microwell plates  
114 (**Figure 1**), demonstrating its scalability and flexibility, although curiously we did not observe  
115 the phenotype in flat-bottomed microwell plates. Time-lapse photography reveals that the  
116 formation of the creeping phenotype is visible from ~4 hours after the mixing of YPD cultures  
117 of **a** and **α** cells at room temperature, and intensifies between about 4 and 8 hours (**Figure 2**).  
118 A complete video of the formation of the creeping phenotype over a 20 hour duration is  
119 available online (**Supplementary Movie**). Moreover, the phenotype is visible for many days,  
120 thus allowing for easy identification of mating type for unknown *S. cerevisiae* cells.

121

122

123



124

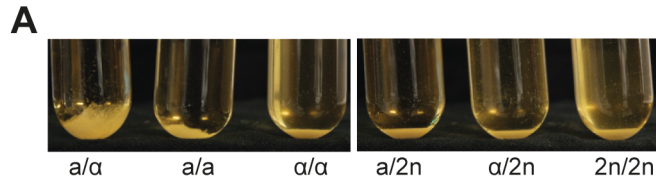

125

126

127

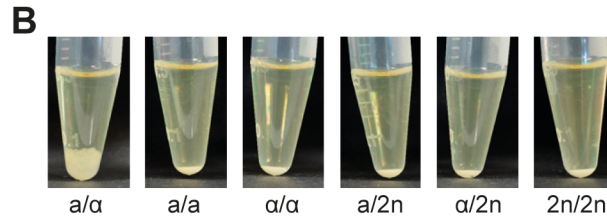

128

129

130

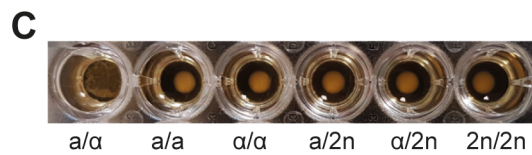

131

132

133

134

135

136

137

**Figure 1: A 1:1 mixture of a/α cells reveals a creeping phenotype.** YPD cultures ( $OD_{600nm}$  0.2) were mixed in equal volumes of: 2 mL each in 20 mL glass tubes (**A**); 250  $\mu$ L each in microcentrifuge tubes (**B**); and 100  $\mu$ L each in a round-bottomed 96-well plate (**C**). Mixtures were allowed to settle on the bench for 18 hours and photographed. The creeping phenotype is only observed for the mixtures of opposite mating types (a/α). Mating type a (a), Mating type  $\alpha$  ( $\alpha$ ), diploid cells (2n) are indicated below the tubes. Note that we did not observe the phenotype in flat-bottomed 96-well plates.

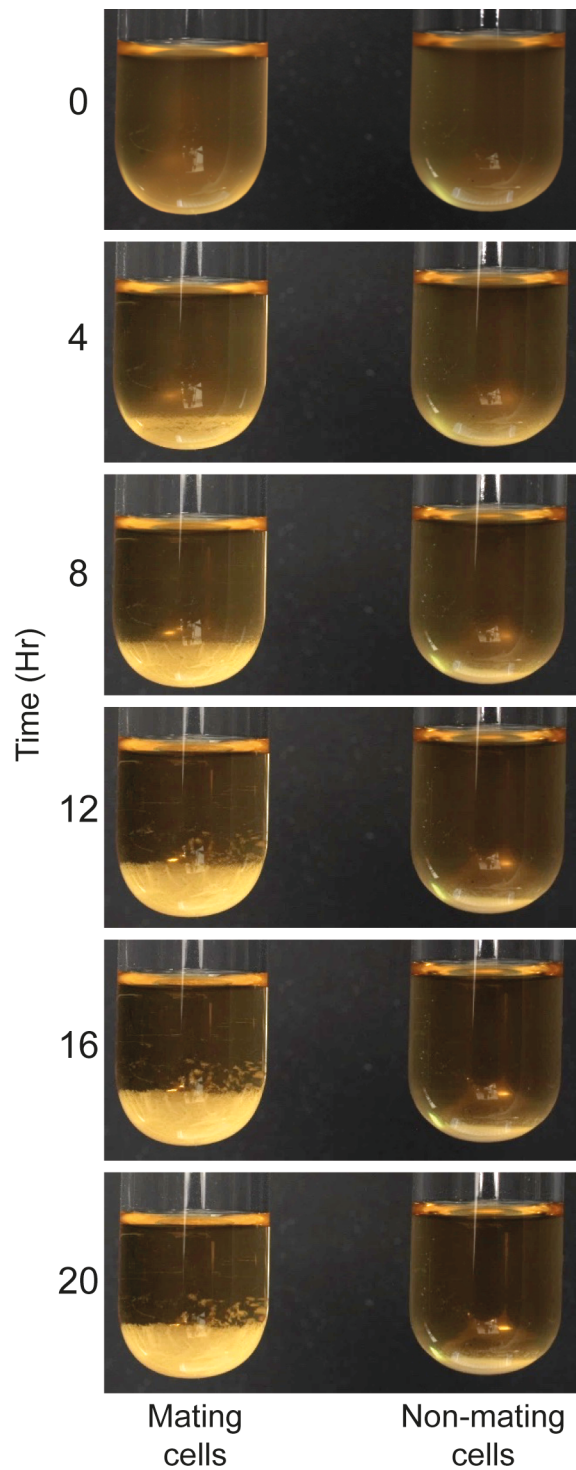

138

139 **Figure 2: Time-lapse photography of the mating assay.** The assay was set up as in **Figure 1A** and photographs  
140 were taken every minute for 20 hours (h). Views at 0, 4, 8, 12, 16 and 20 hours show the formation of the creeping  
141 phenotype compared to a tight pellet for non-mating cells. For a full video, see **Supplementary Movie**.

142

143

#### 144 **Determination of conditions compatible with the mating type assay**

145 We next wanted to further characterize how robust the mating type phenotype is under different  
146 conditions to assess its practicality as a mating type assay (**Figure 3**). We first tried different  
147 media, including rich and synthetic media, and water. The creeping phenotype forms reliably  
148 in both rich and synthetic media containing glucose as the carbon source, but is less obvious  
149 when glycerol is used instead (**Figure 3A**). The phenotype is not revealed when cells are diluted  
150 at OD<sub>600nm</sub> 0.2 in water. Next we tested the effects of cell density and partner ratio on the  
151 phenotype for cells grown in glucose rich medium. Cell density can be varied from 0.2 to 1.8  
152 (OD<sub>600nm</sub>) without affecting the formation of the creeping phenotype (**Figure 3B**), while  
153 increasing the proportion of one partner over 60% impedes the creeping up the side of the  
154 vessel (**Figure 3C**). Finally, we find that the phenotype is obvious at temperatures in the  
155 optimal growth range for *S. cerevisiae* (24°C and 30°C) but is nevertheless still visible when  
156 the cultures are incubated at 37°C (**Figure 3D**). However, as for cells diluted in water,  
157 formation of the creeping phenotype does not occur at 4°C (**Figure 3D**).

158

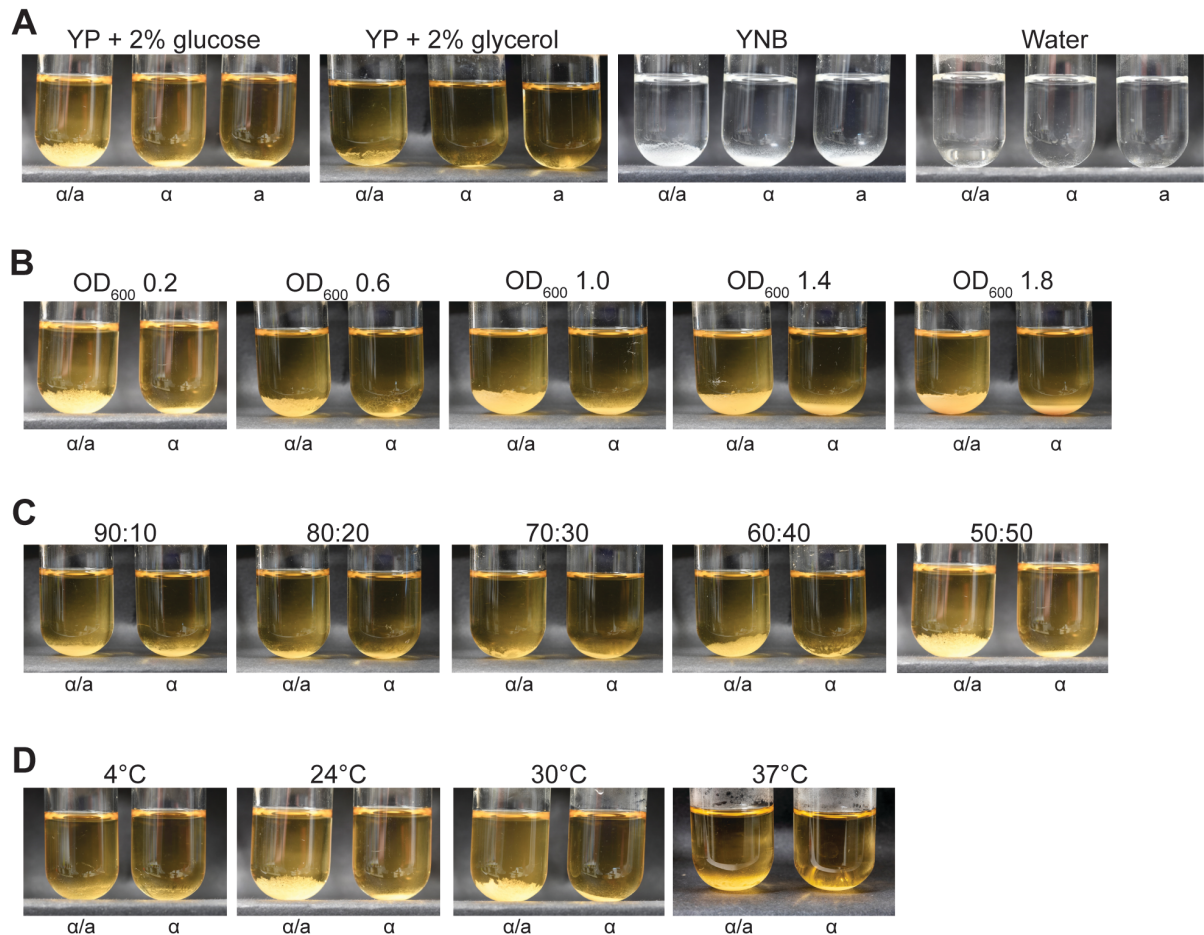

159

160

161 **Figure 3: Establishing working parameters for the mating assay.** Four parameters were varied: medium (A),

162 cell density (B), partner ratio (C), and temperature (D). Strains were diluted to  $OD_{600}$  0.2 in YPD, mixed equally

163 (50:50) and incubated at 24°C unless otherwise indicated. All mixtures were photographed at 18 hours. (A)

164 Overnight YPD cultures were diluted in the indicated media or water prior to the mating assay. Note that YNB

165 and water appear this color because of medium composition, not black and white photography. (B) The same

166 overnight YPD cultures from (A) were diluted to  $OD_{600nm}$  0.2, 0.6, 1.0, 1.4, or 1.8 to perform the assay. (C)

167 Opposite mating type cells were mixed at the different ratios indicated in a final volume of 4 mL. Ratios

168 represent  $\alpha:a$ . (D) Mixtures were incubated at 4°C, 24°C (room temperature), 30°C or 37°C for 18 hours. Note

169 that the first panel in (A) and (B), the last panel in (C) and the second panel in (D) are the same.

170

171

## 172 **Mating type determination of unknown *S. cerevisiae* strains**

173 To assess how robust the assay is to strain type, we selected seven *S. cerevisiae* strains derived  
174 from different wild isolates (Cubillos et al. 2009), and carried out a blind test. Each strain was  
175 individually mixed with known tester **a** and  $\alpha$  strains using standard conditions (YPD medium,  
176 OD<sub>600nm</sub> 0.2, overnight incubation on the bench without shaking). The creeping phenotype is  
177 visible when unknown strains 1, 5, 6 and 7 are paired with tester **a** only, indicating that these  
178 unknown strains are haploid, and are of  $\alpha$  mating type (**Figure 4A**). The opposite was observed  
179 for unknown strains 2, 3 and 4, with the creeping phenotype only visible when mixed with  $\alpha$ ,  
180 indicating they are haploid of **a** mating type. It is noteworthy that while results were obvious  
181 for strains 1 to 6 after overnight incubation (**Figure 4A**), additional incubation for one day was  
182 necessary to unambiguously visualize the creeping phenotype for unknown strain 7, which is  
183 slow growing (**Supplementary Figure 1**). To validate that the mating type determinations are  
184 reliable, we carried out multiplex PCR on these seven strains with primers previously designed  
185 to determine the presence of **a** or  $\alpha$  allele within the active *MAT* locus (Bradbury et al. 2006).  
186 Each of the unknown strains gave the 489 bp **a** or 466 bp  $\alpha$  band as expected based on the  
187 creeping phenotype assay (**Figure 4B**), which is consistent with the previous mating type  
188 characterization of these strains (**Supplementary Table 1**). Together, these results show that  
189 the assay can accurately determine mating type for a variety of *S. cerevisiae* strains under a  
190 variety of conditions.

191

192

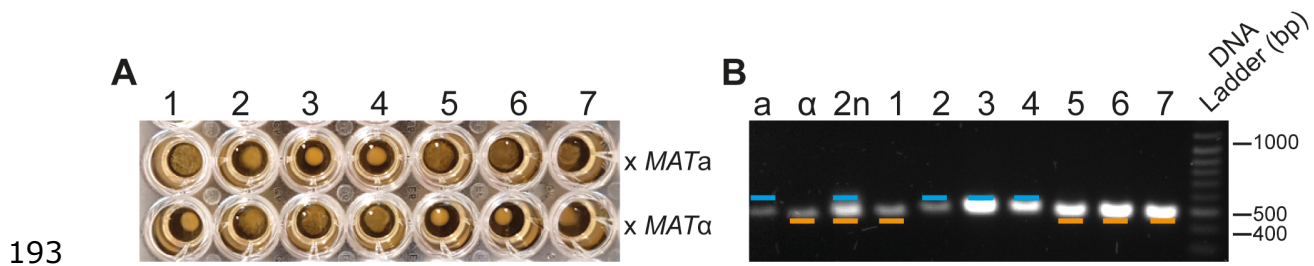

193  
194 **Figure 4: Determination of mating type of unknown *S. cerevisiae* strains.** (A) Seven strains where mating  
195 type was blinded were mixed with *MATa* and *MATα* tester strains using standard assay conditions (YPD medium,  
196 OD<sub>600nm</sub> 0.2, 24°C, overnight incubation). The creeping phenotype is visible for strains 1, 5, 6 and 7 crossed with  
197 *MATa* tester but not with *MATα* tester. The opposite result is visible for unknown strains 2, 3 and 4. Mixtures  
198 were photographed at 18 hours. (B) Mating assay results were confirmed by multiplex PCR carried out on cells  
199 from the seven unknown strains and tester *a*, *α* and *2n* strains. Expected *MATa* and *MATα* specific amplicons  
200 are 489 bp (blue line) and 466 bp (green line), respectively.

201

202 While we have characterized the creeping phenotype as a simple assay for *S. cerevisiae* mating  
203 type here, we have not attempted to ascertain the basis for the phenotype. The timing of the  
204 creeping phenotype, starting at ~4 hours, suggests it is a property of zygotes formed from the  
205 mating rather than mating reaction (Duntze et al. 1970; Sena et al. 1973), although we cannot  
206 exclude that it is a property of unmated haploids still responding to mating pheromone. The  
207 requirement for a growth medium, the poor performance on glycerol (which is not a favoured  
208 carbon source for *S. cerevisiae*), and the absence of the phenotype under 4°C incubation all  
209 suggest that growth and/or metabolism is required for the assay to work, and these requirements  
210 are reminiscent of those reported for mating (Sena et al. 1973; Lipke et al. 1976; Fehrenbacher  
211 et al. 1978). However, we cannot fully rule out an osmotic effect. Furthermore, we do not know  
212 if these requirements are for the initial mating reaction or subsequent zygote activity, or both.  
213 Similarly, we do not know what the mechanistic basis of the creeping is, including whether it  
214 involves adhesion changes (such as those seen during mating (Betz et al. 1978; Fehrenbacher

215 et al. 1978)) and/or changes in cell density. Future work targeted at the molecular basis of the  
216 phenotype is required to answer these questions.

217

## 218 **Conclusions**

219 Here, we describe a rapid, inexpensive and robust method to determine not only the mating  
220 type of an unknown *S. cerevisiae* strain, but also whether the strain is haploid or diploid. While  
221 we serendipitously discovered the creeping phenotype in our laboratory, anecdotal evidence  
222 suggests we are not the first to discover it, and we understand it is currently used as a mating  
223 type assay in some *S. cerevisiae* laboratories. Therefore, we focused on comprehensively  
224 evaluating and optimizing the phenotype so that it can be more widely utilized as a mating type  
225 assay by the yeast community. The assay is as simple as adding an “unknown” sample to known  
226  $\mathbf{a}$  and  $\alpha$  strains, and observing the results after leaving for 18 hours. Thus, this assay is cheaper  
227 and more robust than currently utilised methods, with less hands-on time. So far all *S.*  
228 *cerevisiae* strains that we have tried in our laboratory are amenable to the assay, but it may not  
229 work with certain mutants, and we do not know whether it will work for other *Saccharomyces*  
230 species. Finally, the molecular basis for the creeping phenotype is unknown, but as the  
231 phenotype is easily screened in 96-well plate format, it is amenable to high-throughput genetic  
232 dissection, for example, using the yeast knockout collection (Giaever and Nislow 2014).

233

## 234 **Funding**

235 This work was supported by a grant from the New Zealand Marsden Fund [10-MAU-072] to  
236 ARDG.

237

238 **References**

- 239 Beggs JD. 1978. Transformation of yeast by a replicating hybrid plasmid. *Nature* **275**: 104-  
240 109.
- 241 Betz R, Duntze W, Manney TR. 1978. Mating-factor-mediated sexual agglutination in  
242 *Saccharomyces cerevisiae*. *FEMS Microbiol Lett* **4**: 107-110.
- 243 Bradbury JE, Richards KD, Niederer HA, Lee SA, Rod Dunbar P, Gardner RC. 2006. A  
244 homozygous diploid subset of commercial wine yeast strains. *Antonie Van*  
245 *Leeuwenhoek* **89**: 27-37.
- 246 Cubillos FA, Louis EJ, Liti G. 2009. Generation of a large set of genetically tractable haploid  
247 and diploid *Saccharomyces* strains. *FEMS Yeast Res* **9**: 1217-1225.
- 248 Duntze W, MacKay V, Manney TR. 1970. *Saccharomyces cerevisiae*: a diffusible sex factor.  
249 *Science* **168**: 1472-1473.
- 250 Fehrenbacher G, Perry K, Thorner J. 1978. Cell-cell recognition in *Saccharomyces*  
251 *cerevisiae*: regulation of mating-specific adhesion. *J Bacteriol* **134**: 893-901.
- 252 Giaever G, Nislow C. 2014. The yeast deletion collection: a decade of functional genomics.  
253 *Genetics* **197**: 451-465.
- 254 Haber JE. 2012. Mating-type genes and *MAT* switching in *Saccharomyces cerevisiae*.  
255 *Genetics* **191**: 33-64.
- 256 Hinnen A, Hicks JB, Fink GR. 1978. Transformation of yeast. *PNAS* **75**: 1929-1933.
- 257 Lipke PN, Taylor A, Ballou CE. 1976. Morphogenic effects of alpha-factor on  
258 *Saccharomyces cerevisiae* a cells. *J Bacteriol* **127**: 610-618.
- 259 Sena EP, Radin DN, Fogel S. 1973. Synchronous mating in yeast. *PNAS* **70**: 1373-1377.
- 260 Sherman F. 1991. Getting started with yeast. *Methods Enzymol* **194**: 3-21.
- 261 Sprague GFJ. 1991. Assay of yeast mating reaction. *Methods Enzymol* **194**: 77-93.
- 262
